# Supplementary material for: Stimuli-responsive nanotheranostics intended for oncological diseases: in vitro evaluation of their target, diagnostic and drug release capabilities
Source: Royal Society of Chemistry journal article supplement (doi:10.1039/c8nj05289a), 2018-12-18

**Supp. Matt. Scheme (a).** Proposed mechanism for possible interactions between (a) *MNPs@FA* and *Doxo* at pH<6. (b) *MNPs@FA* and *Doxo* at pH=6. (c) *MNPs* and *Doxo*. Orange and violet colors imply that adsorption happened through hydrogen bond and hydrophobic interactions. Blue color implies that the adsorption happened through electrostatic interactions. Red color means that the interaction did not take place because of repulsion forces.

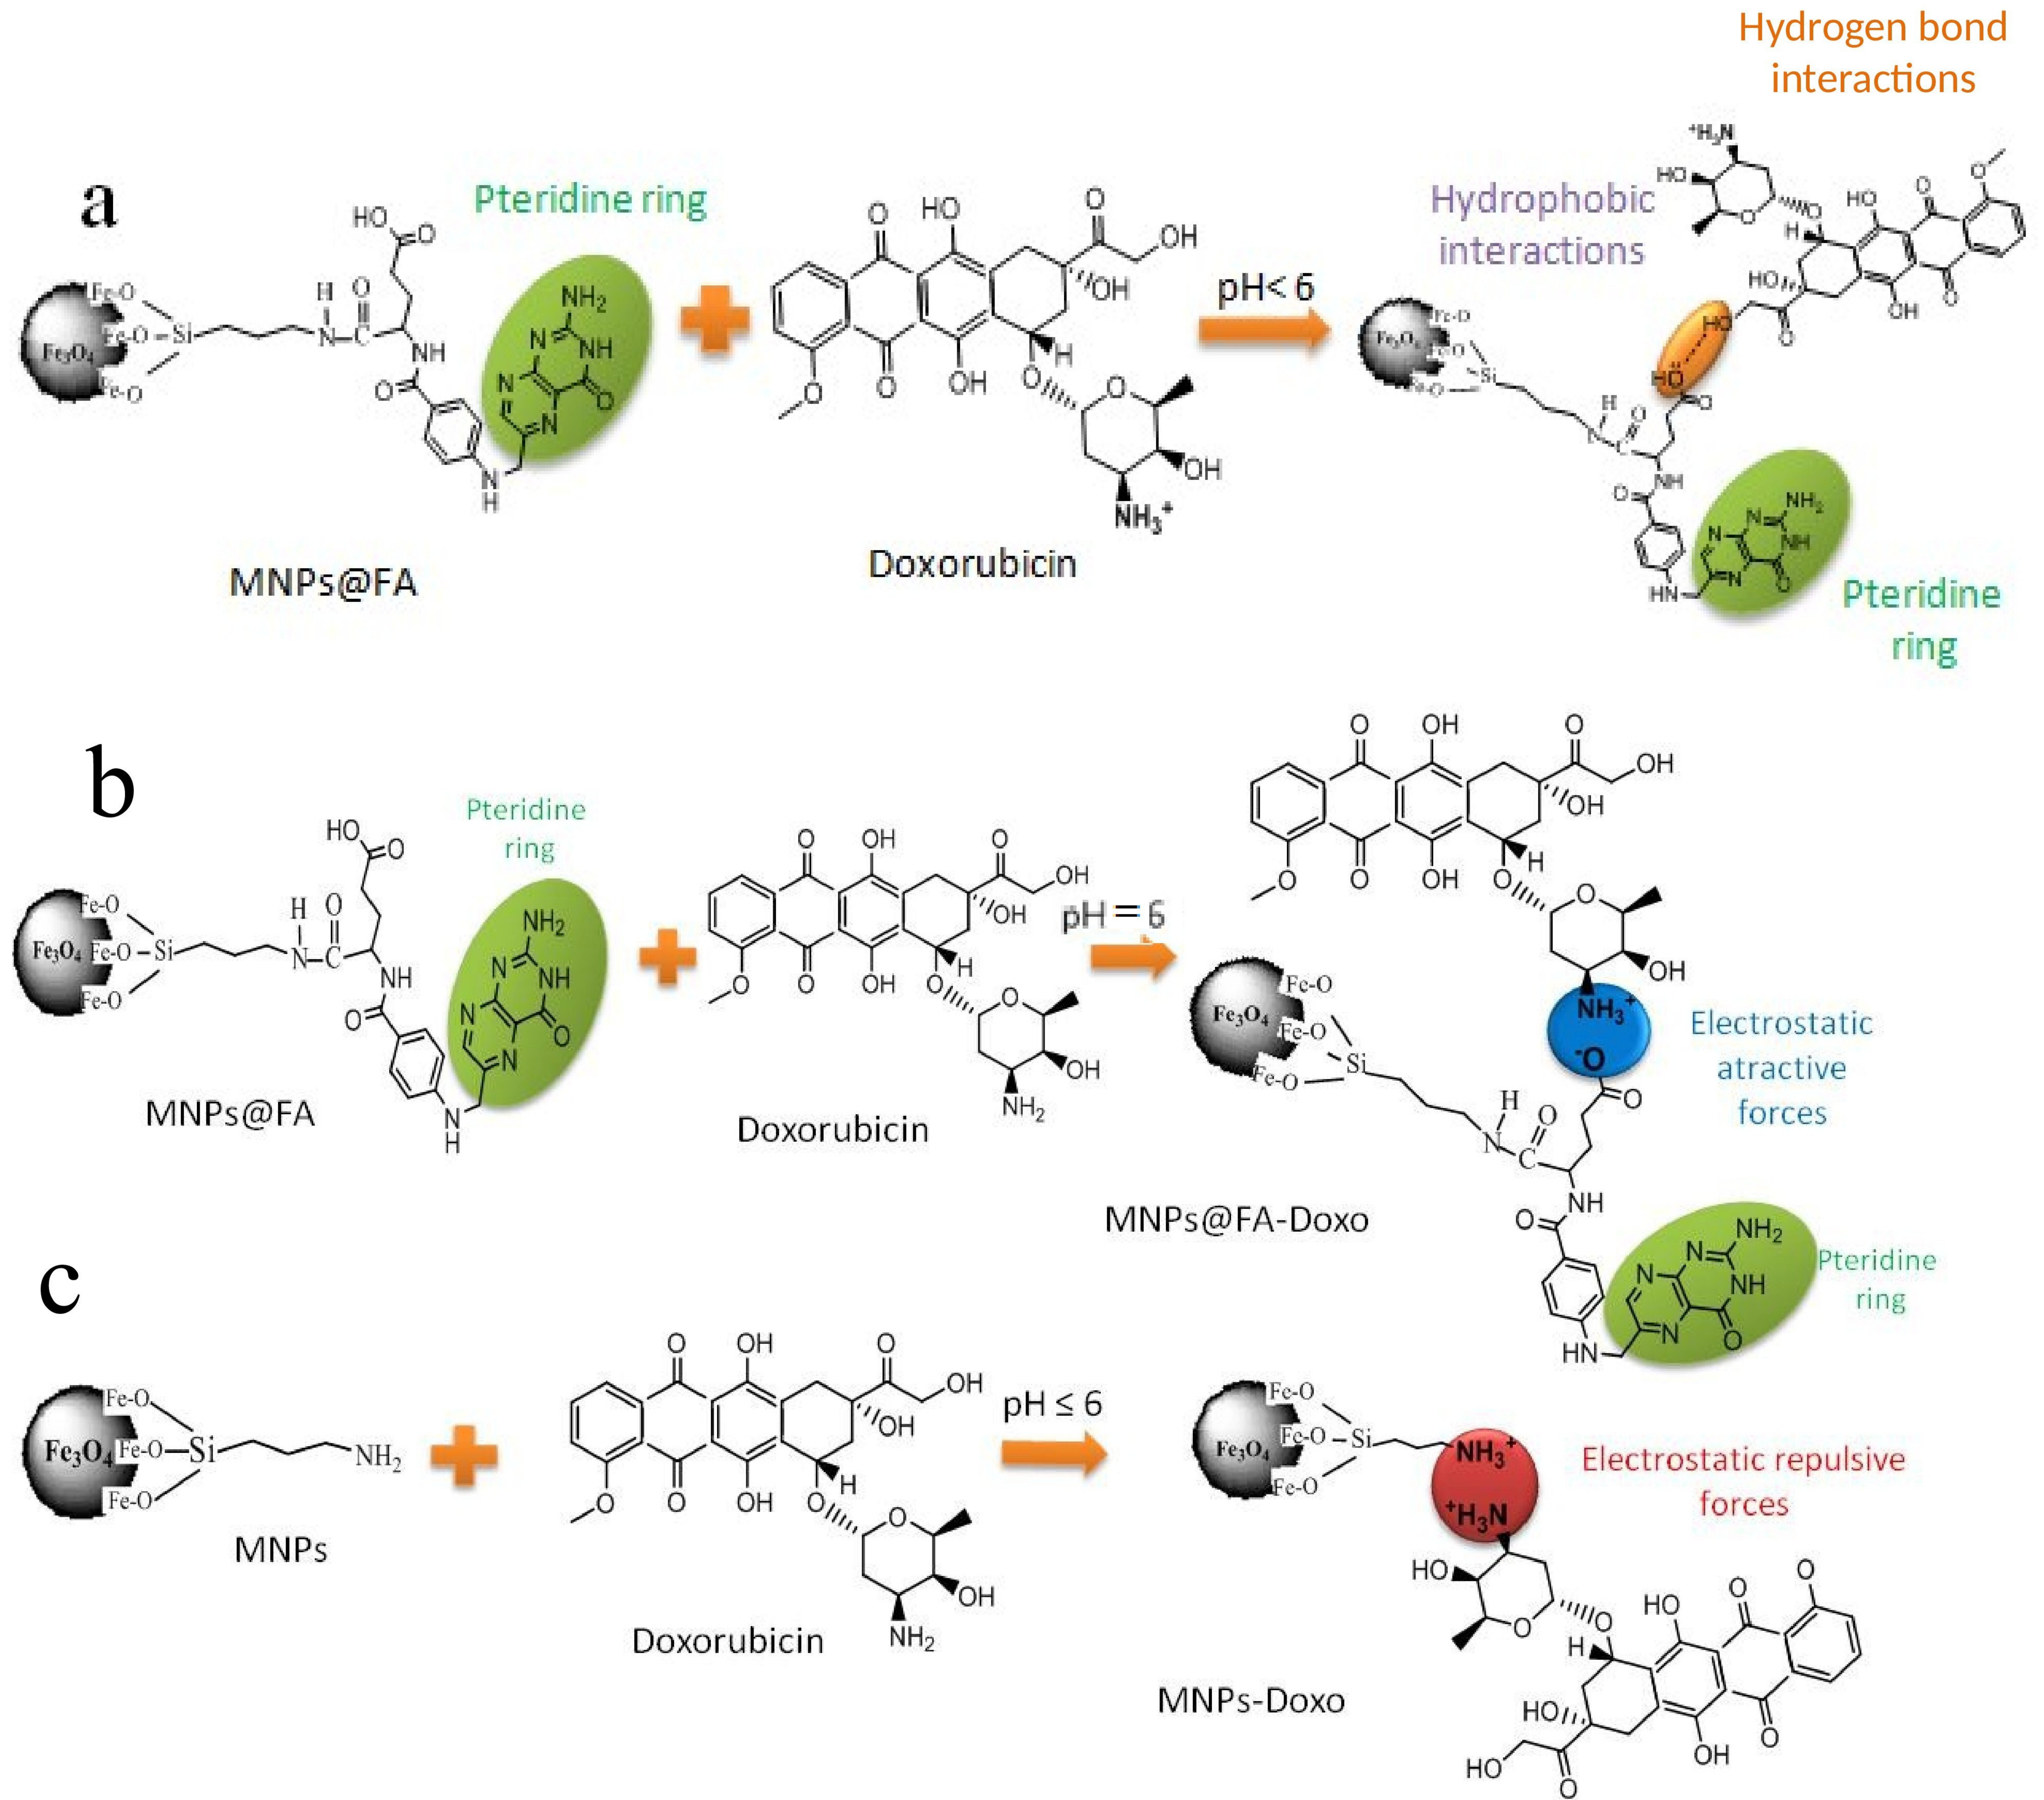

Supplement: c8nj05289a1.pdf [file c8nj05289a1.pdf]
