# Supplementary material for: Stimuli-responsive nanotheranostics intended for oncological diseases: in vitro evaluation of their target, diagnostic and drug release capabilities
Source: Royal Society of Chemistry journal article supplement (doi:10.1039/c8nj05289a), 2018-12-18

Supp. Mat (e) UV-vis spectra of *MNPs@FA-Doxo1* and *MNPs@FA-Doxo6* dispersions. (f) Magnification of Fig.e in the region between 300 and 700 nm.

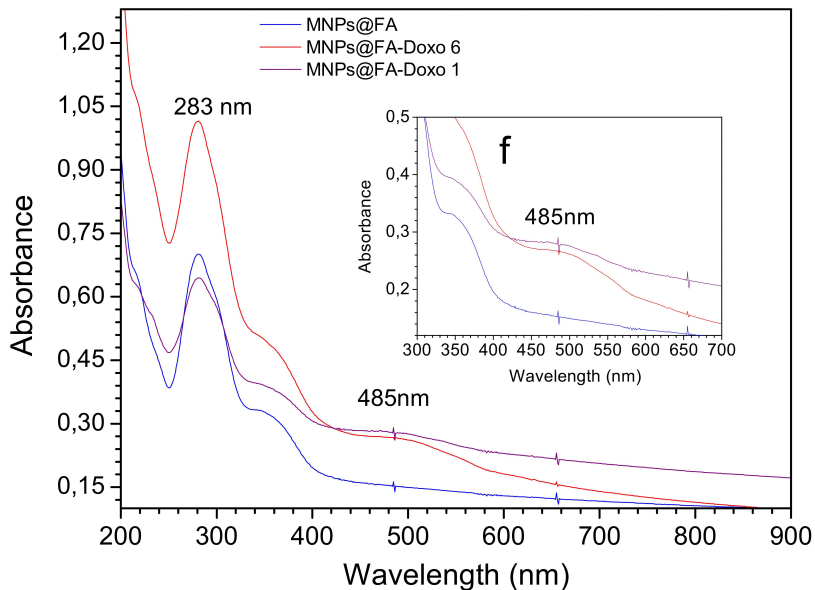

Supplement: c8nj05289a7.pdf [file c8nj05289a7.pdf]
