# Supplementary material for: Stimuli-responsive nanotheranostics intended for oncological diseases: in vitro evaluation of their target, diagnostic and drug release capabilities
Source: Royal Society of Chemistry journal article supplement (doi:10.1039/c8nj05289a), 2018-12-18

Supp. Mat (j) Representation of T2 transverse relaxation rate obtain with and without *Doxo* for the concentrations of 0.2 mM.

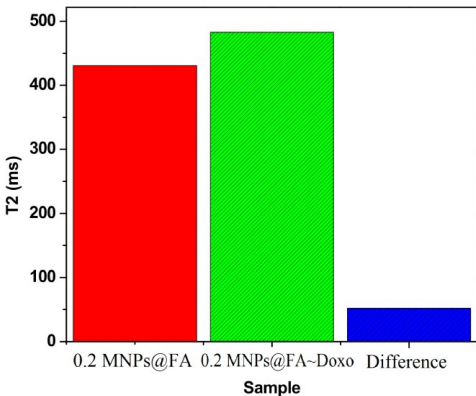

Supplement: c8nj05289a10.pdf [file c8nj05289a10.pdf]
