# Supplementary figures and images for: Stimuli-responsive nanotheranostics intended for oncological diseases: in vitro evaluation of their target, diagnostic and drug release capabilities
Source: Royal Society of Chemistry journal article supplement (doi:10.1039/c8nj05289a), 2018-12-18

# Supp. Mat (h) Amount of *Doxo* incorporated on *MNPs@FA* surface as a function of the time.

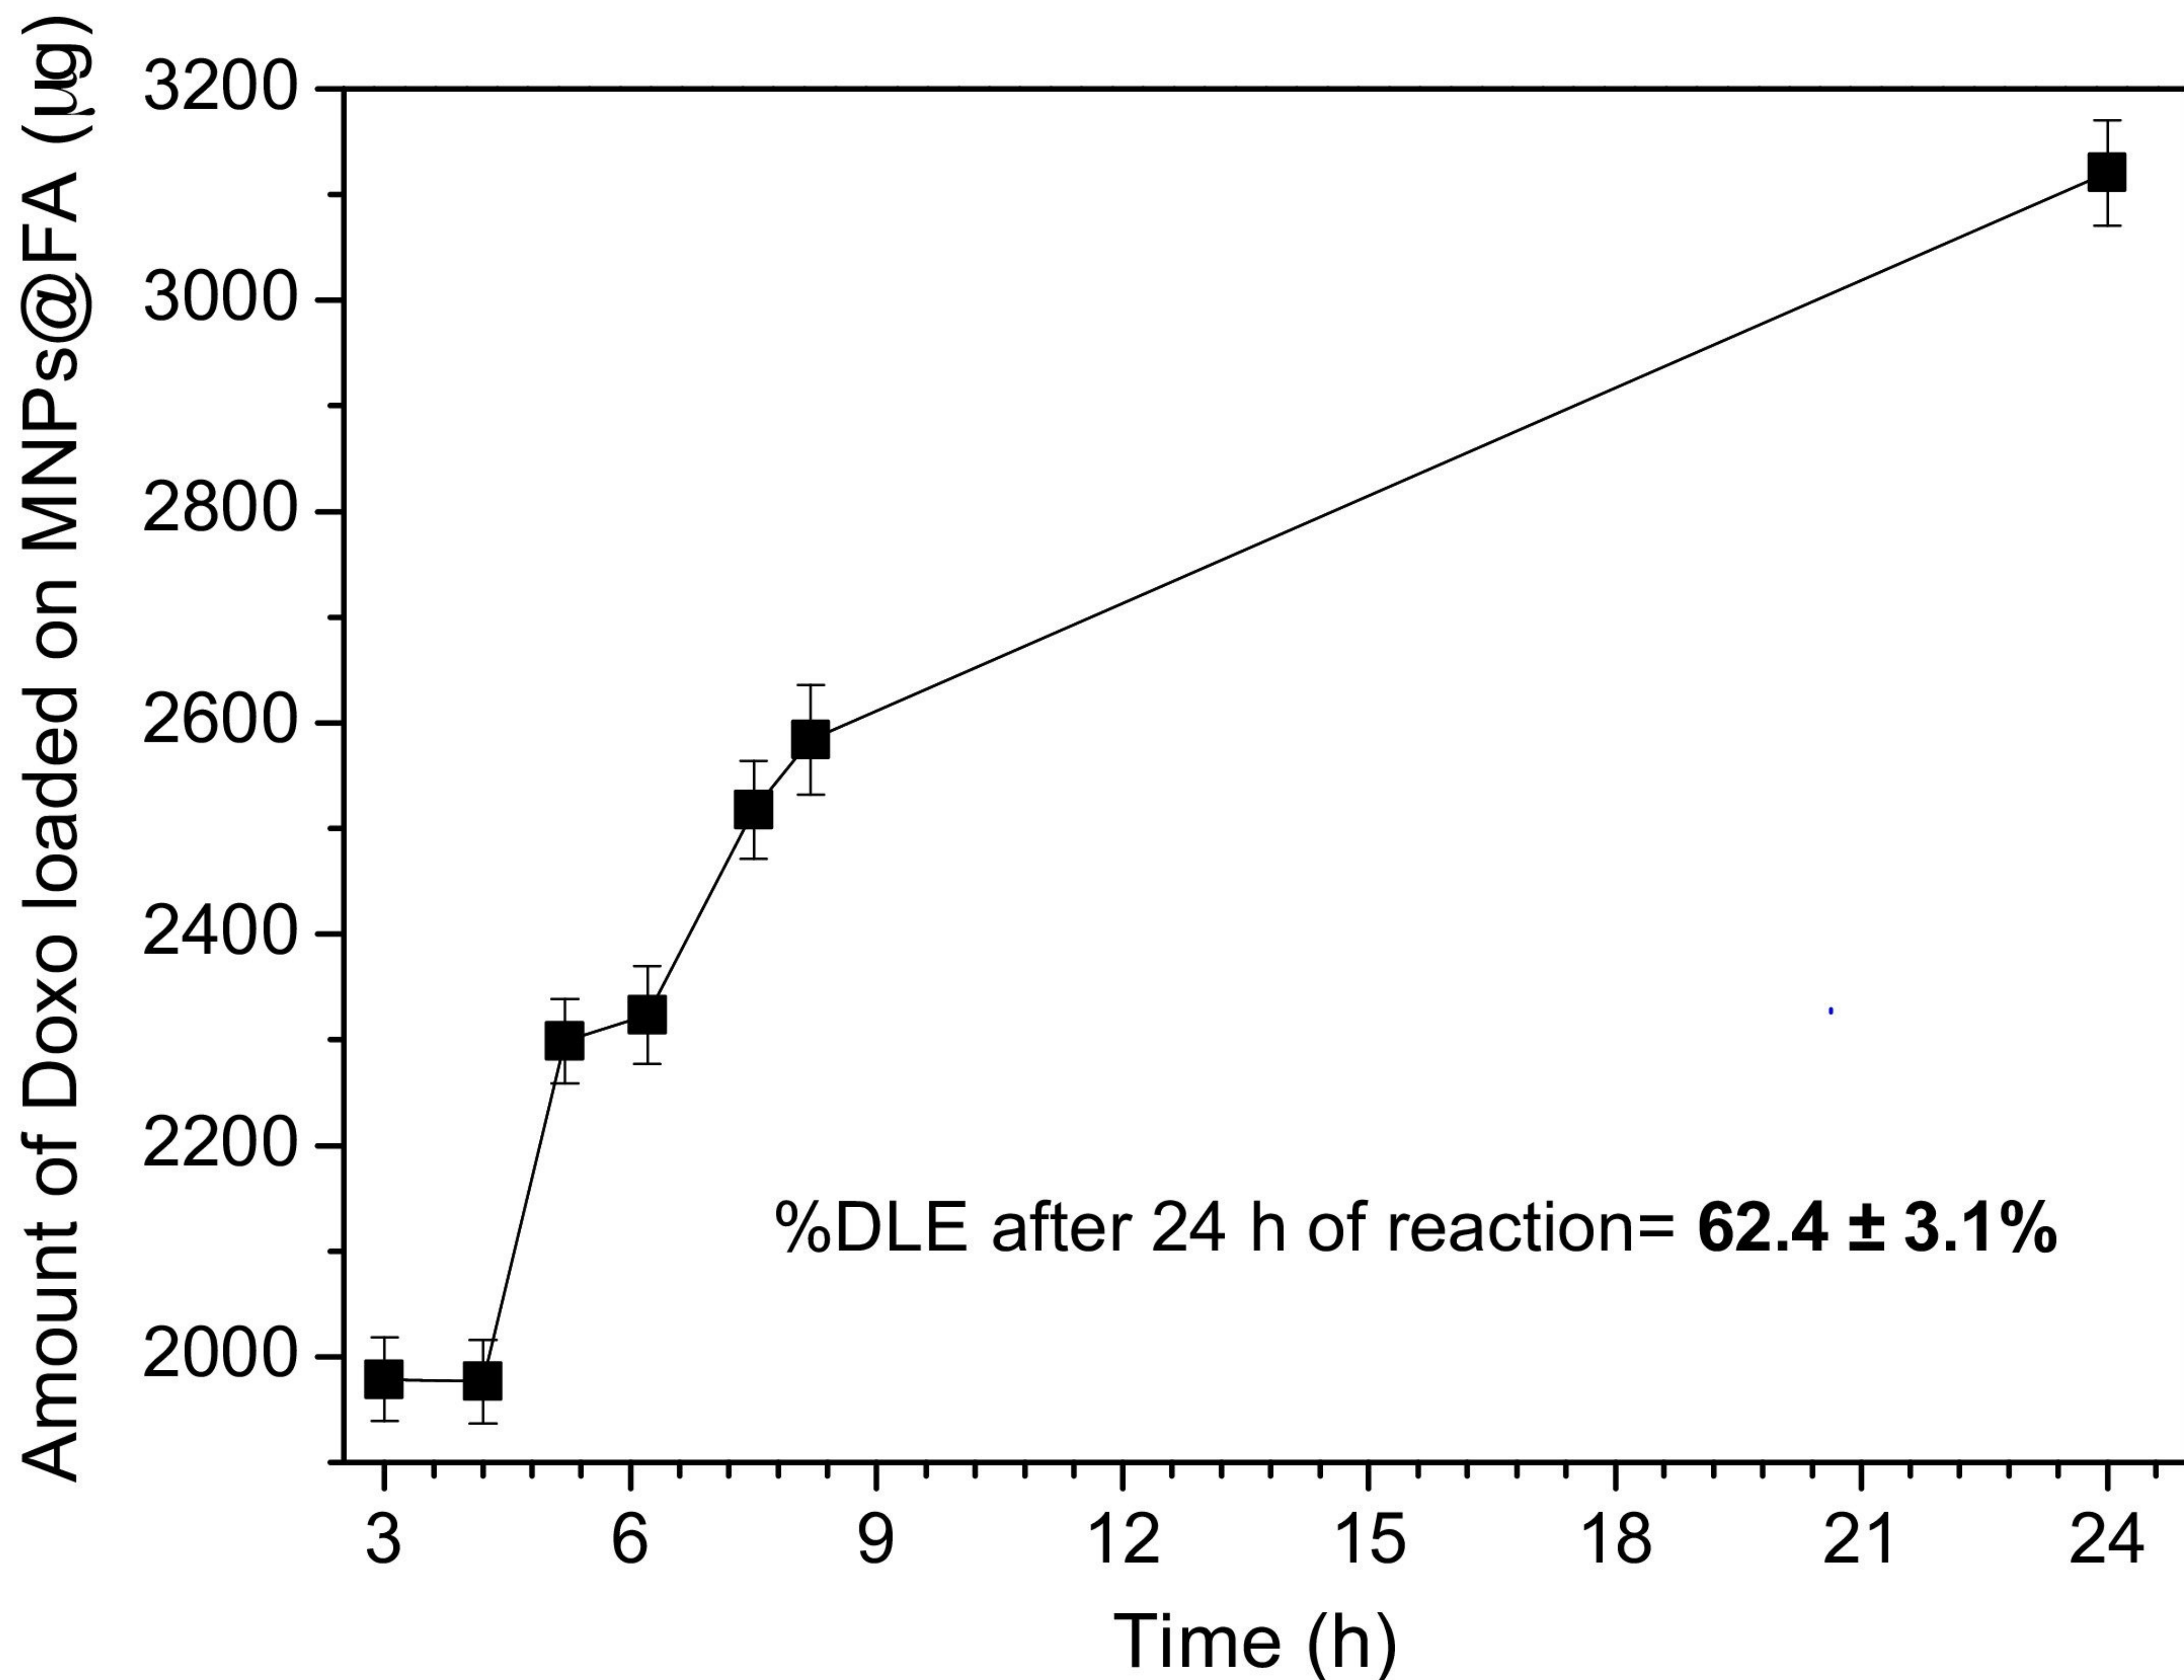

Supplement: c8nj05289a2.pdf [file c8nj05289a2.pdf]

## Supp. Mat. (a) FTIR spectra of *MNPs@FA-Doxo0.5* and *MNPs@FA-Doxo2*

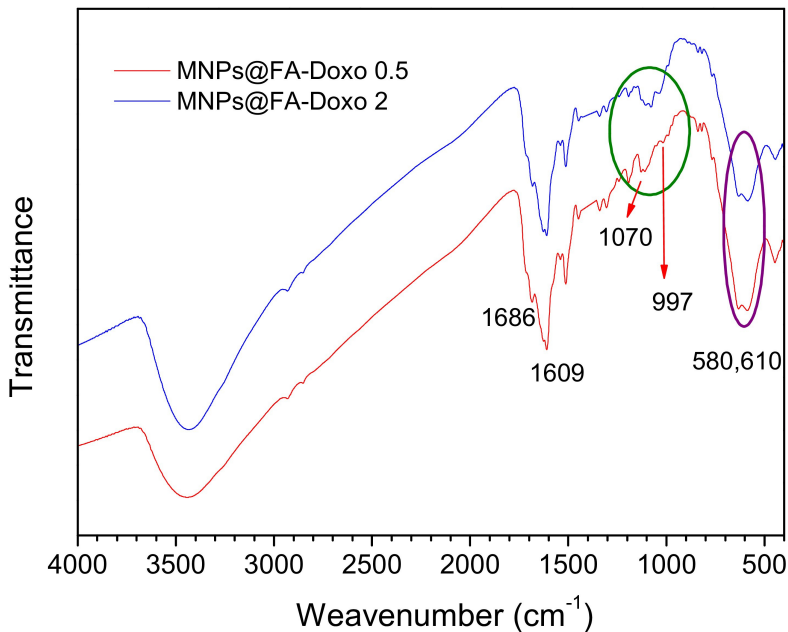

Supplement: c8nj05289a3.pdf [file c8nj05289a3.pdf]

Supp. Mat (b) FTIR spectrum of *MNPs@FA-Doxo* obtained at pH=6.

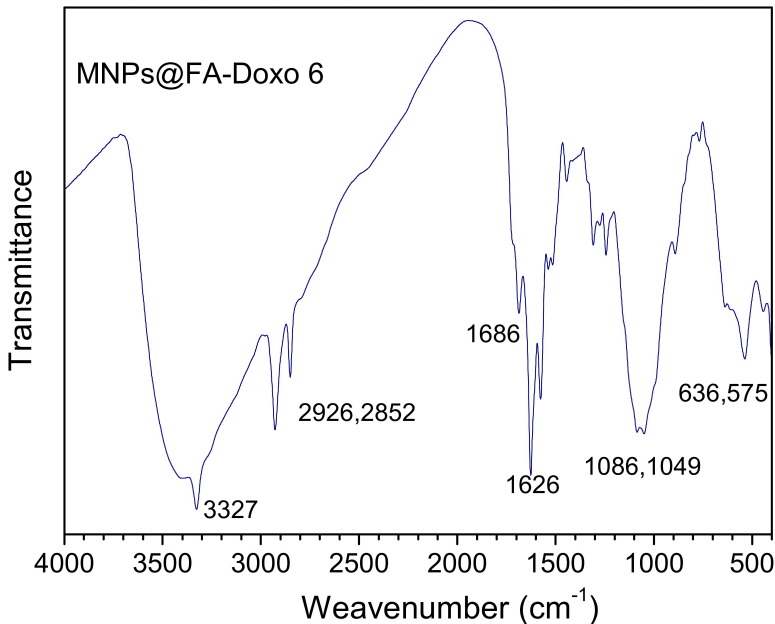

Supplement: c8nj05289a4.pdf [file c8nj05289a4.pdf]

## Supp. Mat (c) FTIR spectra of *MNPs* before and after loading of *Doxo*

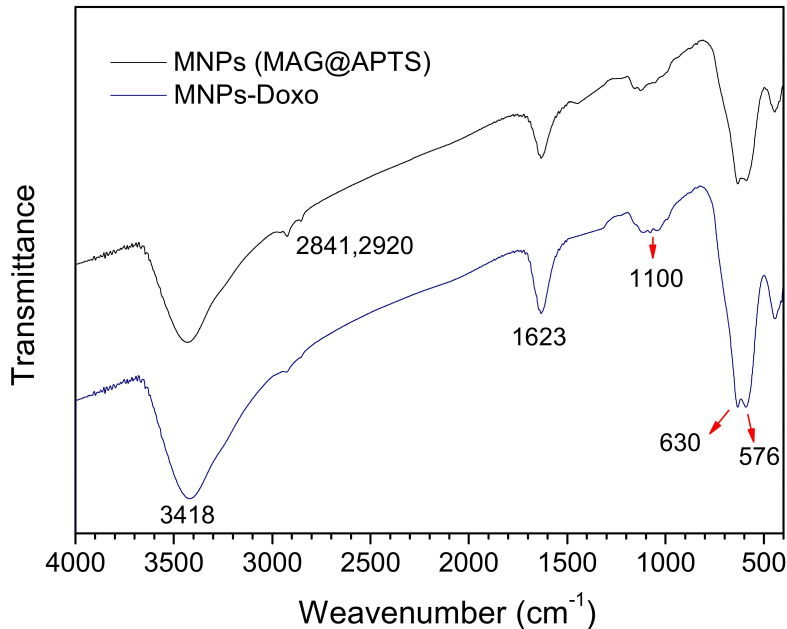

Supplement: c8nj05289a5.pdf [file c8nj05289a5.pdf]

Supp. Mat (d) UV-vis spectra of *Folic Acid* and *Doxorubicin* solutions.

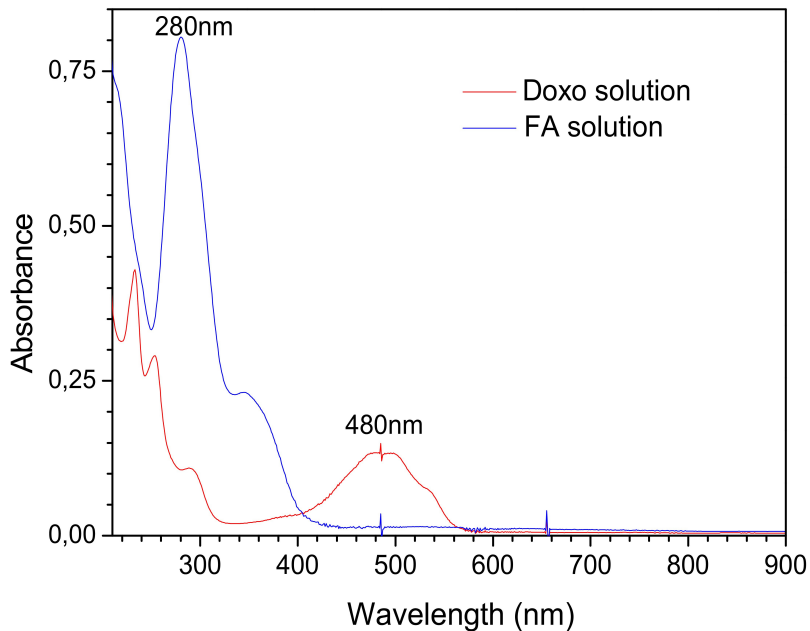

Supplement: c8nj05289a6.pdf [file c8nj05289a6.pdf]

Supp. Mat. (g) TEM images of *MNPs@FA* and *MNPs@FA-Doxo*.

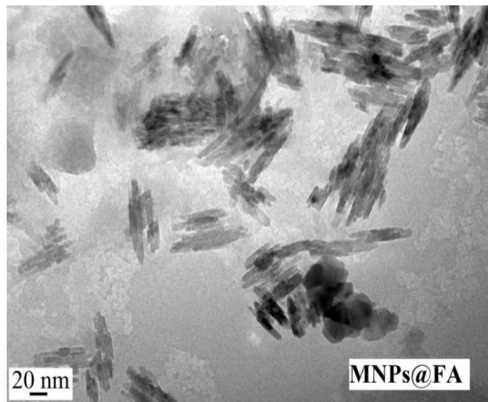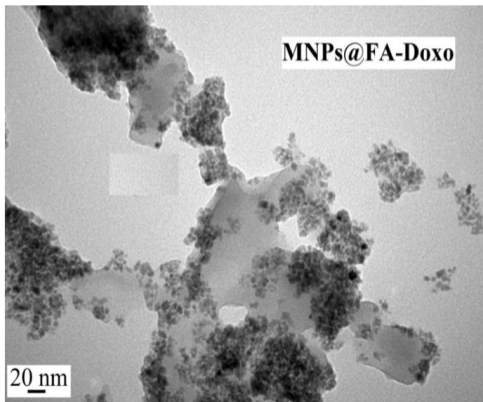

Supplement: c8nj05289a8.pdf [file c8nj05289a8.pdf]

## Supp. Mat. (i) Linear dependency between relaxation rate and nanoparticles concentration

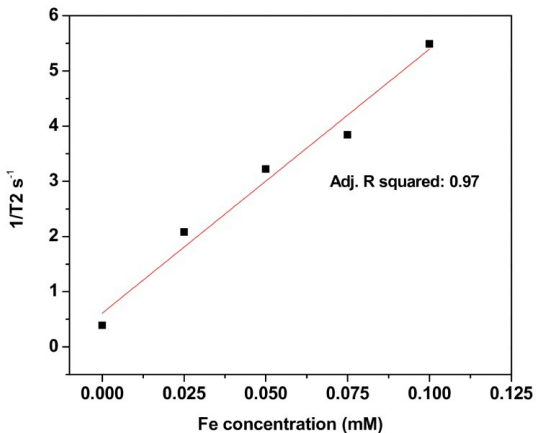

Supplement: c8nj05289a9.pdf [file c8nj05289a9.pdf]
